# Supplementary material
Source: PubMed Central journal article supplement (PMC7954387)
Supplement: awaa382_supplementary_data.pdf [file awaa382_supplementary_data.pdf]

## **Supplementary Material**

### **Edu Proliferation Assay**

Primary tumor tissue was dissociated and tumor cells were cultured in NeuroCult Basal Medium (Stemcell, 05700) supplemented with NeuroCult Proliferation Supplement (Stemcell, 05701), EGF [20ng/mL], FGF [20ng/mL], and Heparin (0.25%). 75,000 or 100,000 Single cells were plated as a monolayer in 12 well plates coated with vitronectin (Corning Synthemax, 89235-046), accutased at designated time points, and then the Click-iT Plus Edu Kit (Invitrogen, C10636) was used according to manufacturer's protocol. Cells were then run on a BD-LSR II flow cytometer and analyzed in FlowJo.

### **Cytokine Array**

Snap frozen tumor tissue was homogenized and lysed in 1x PBS lysis buffer containing 1% Triton, 10 $\mu$ g/mL Aprotinin (Sigma, A6279), 10 $\mu$ g/mL Leupeptin (Sigma, L8511), and 10 $\mu$ g/mL Pepstatin (Sigma, P4265). 500 $\mu$ g of pooled sample protein was used according to manufacturer's instructions for the Mouse Cytokine Array Panel A (R&D Systems, ARY006). The blot was developed and visualized via HRP. Densitometry quantification was performed in ImageJ Fiji.

### **Enzyme Linked Immunosorbent Assay**

Snap frozen tumor tissue was mechanically homogenized and sonicated in lysis buffer supplemented with protease and phosphatase inhibitors. Cell lysates were subjected to sonication in supplemented lysis buffer. Protein concentrations were determined using a Bradford protein assay (BioRad, 5000001). ELISA assays were performed for CCL2 (R&D, DY-479), CCL7 (Boster, EKO683), CCL8 (R&D, DY790), CCL12 (R&D, MCC120) and VEGFA (R&D, MMV00) according to the manufacturer's instructions

### **Human RNA Sequencing**

The following has been adapted from (Mackay *et al.*, 2017). mRNA gene expression data was obtained from Agilent WG2.5, Affymetrix U133Plus2.0 or RNA sequencing platforms. Gene expression was processed from two color Agilent microarrays using the R packages marray and limma and from single channel Affymetrix arrays using the affy package. Differential expression was assigned for microarray data using the limma package based upon a false discovery rate of

5%. RNASeq was aligned with Bowtie2 and TopHat and summarized as gene level fragments per kilobase per million reads sequenced using BEDTools and cufflinks/cuffnorm. Following rlog transformation and normalization, differential expression was assigned with DESeq.2. Known Ensembl genes were further filtered to remove low abundance genes in all three datasets whose maximal expression was within the lowest 20% of all expression values based upon probe intensities or read depth. Replicate probes/features for each gene were removed by selecting those with the greatest median absolute deviation (MAD) in each dataset. Following centering within each dataset, log-transformed expression measures were combined and further normalized using pairwise loess normalization.

### **BMDM and Microglia Cell Cultures**

BMDMs and microglia were isolated and cultured as previously described (Herting *et al.*, 2019; Chen *et al.*, 2020). Briefly, bone marrow was isolated from adult CL57BL/6 mice and cells were cultured at 37°C for 6 days in DMEM high glucose culture medium (Gibco, 10569-010) supplemented with 10% FBS, 1X L-glutamine, 1X Penicillin/Streptomycin, and M-CSF (40ng/mL). On day 7 post isolation, 2 million cells/well were plated in a 6 well tissue culture treated plate and incubated overnight. The next morning cells were incubated in FBS deficient media (0.5%) for 3 hours and then stimulated with recombinant human PDGFA (0-100ng/mL; R&D Systems) or PDGFB (0-100 ng/mL; R&D Systems) for 6 hours. RNA was collected using Trizol (ThermoFisher) added directly to the tissue culture plate and then stored at -80°C.

Microglia were isolated from CL57BL/6 pups aged 0-2 days old and plated on a poly-D-lysine coated (10 mg/mL) T75 flask in DMEM high glucose media containing M-CSF (40ng/mL). Approximately 10 days later, microglia were gently rinsed off the flask and 1 million cells/well were then plated on a 6-well tissue culture treated plate overnight. Cells were then incubated in FBS deficient media for 3 hours prior to stimulation with PDGFA or PDGFB as described above.

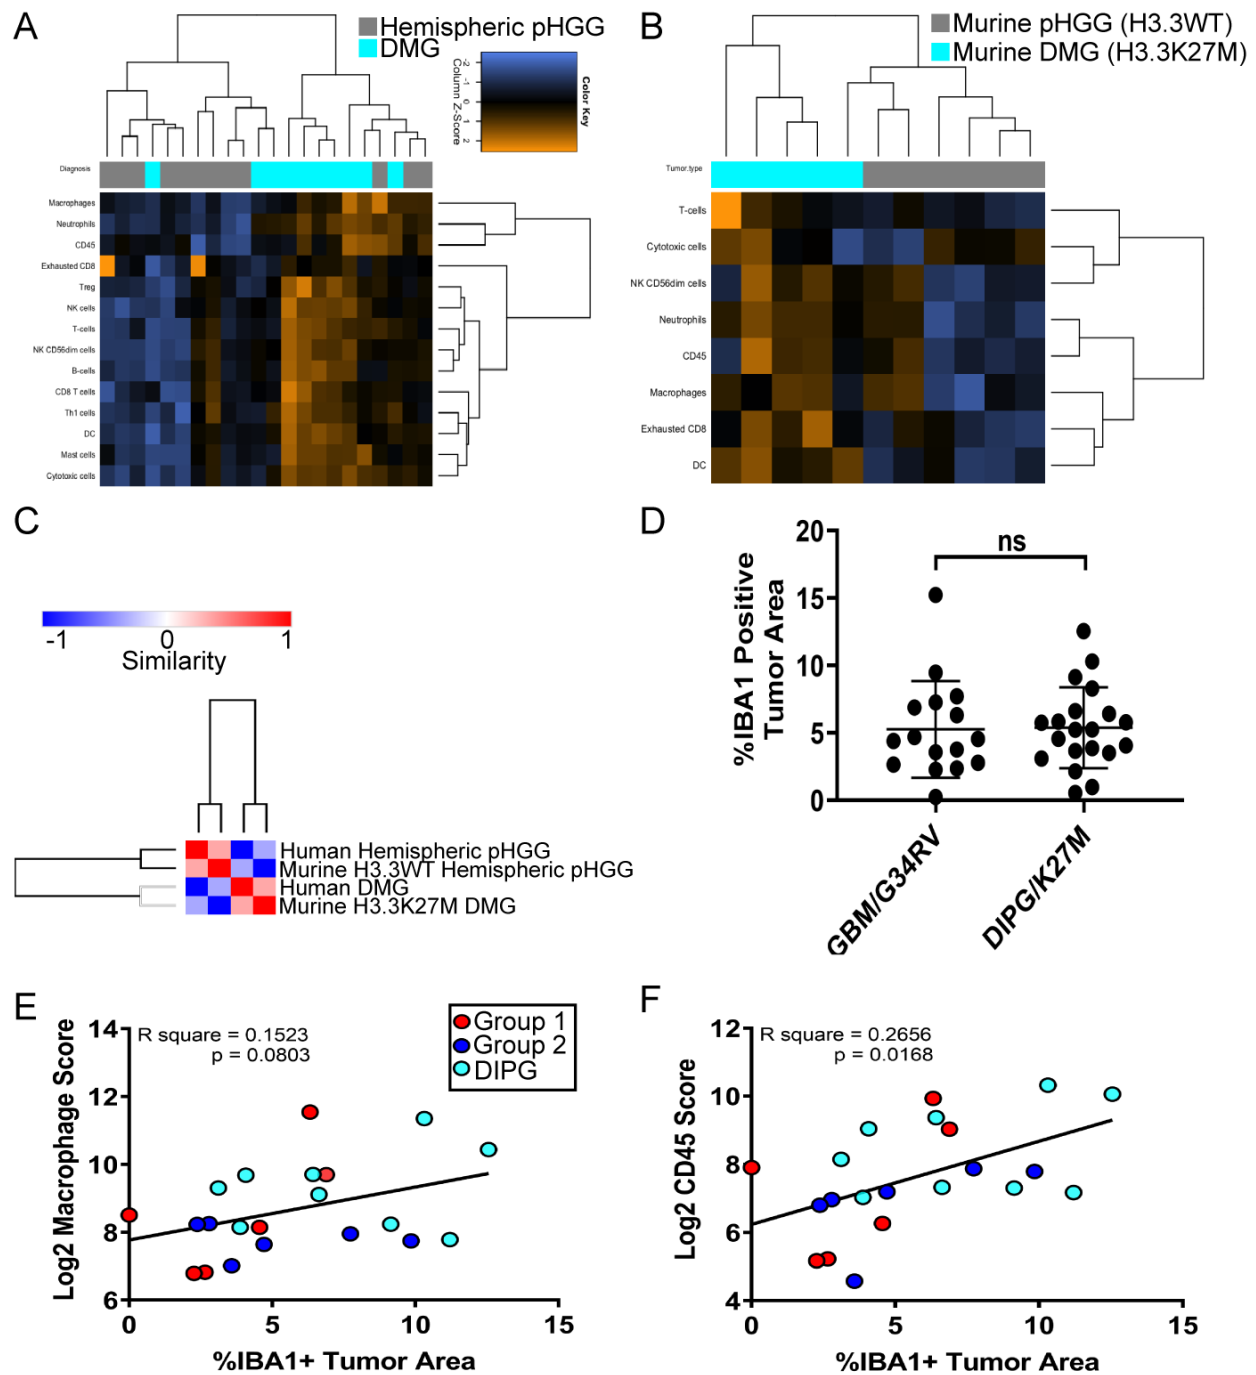

**Figure 1.** (A) Unsupervised hierarchical clustering of cell type scores obtained from NanoString on human pGGs and on (B) bulk tumor tissue from H3.3WT Hemispheric pGGs (n=5) or H3.3K27M DIPGs (n=5) in *Ntva;Cdkn2a*<sup>-/-</sup> mice. (C) Similarity matrix of human hemispheric pGG and DMG, and murine hemispheric pGG and DMG, clustered by similarity based on the expression of all detected genes in the NanoString panel. (D) Quantification of IBA1 staining in human pGG samples, separated by molecular subtype (GBM/H3G34RV mutant vs

DIPG/H3K27M mutant). **(E)** Macrophage Score and **(F)** CD45 Scores obtained from NanoString correlated with %IBA1+ staining in matched human samples. n=21.

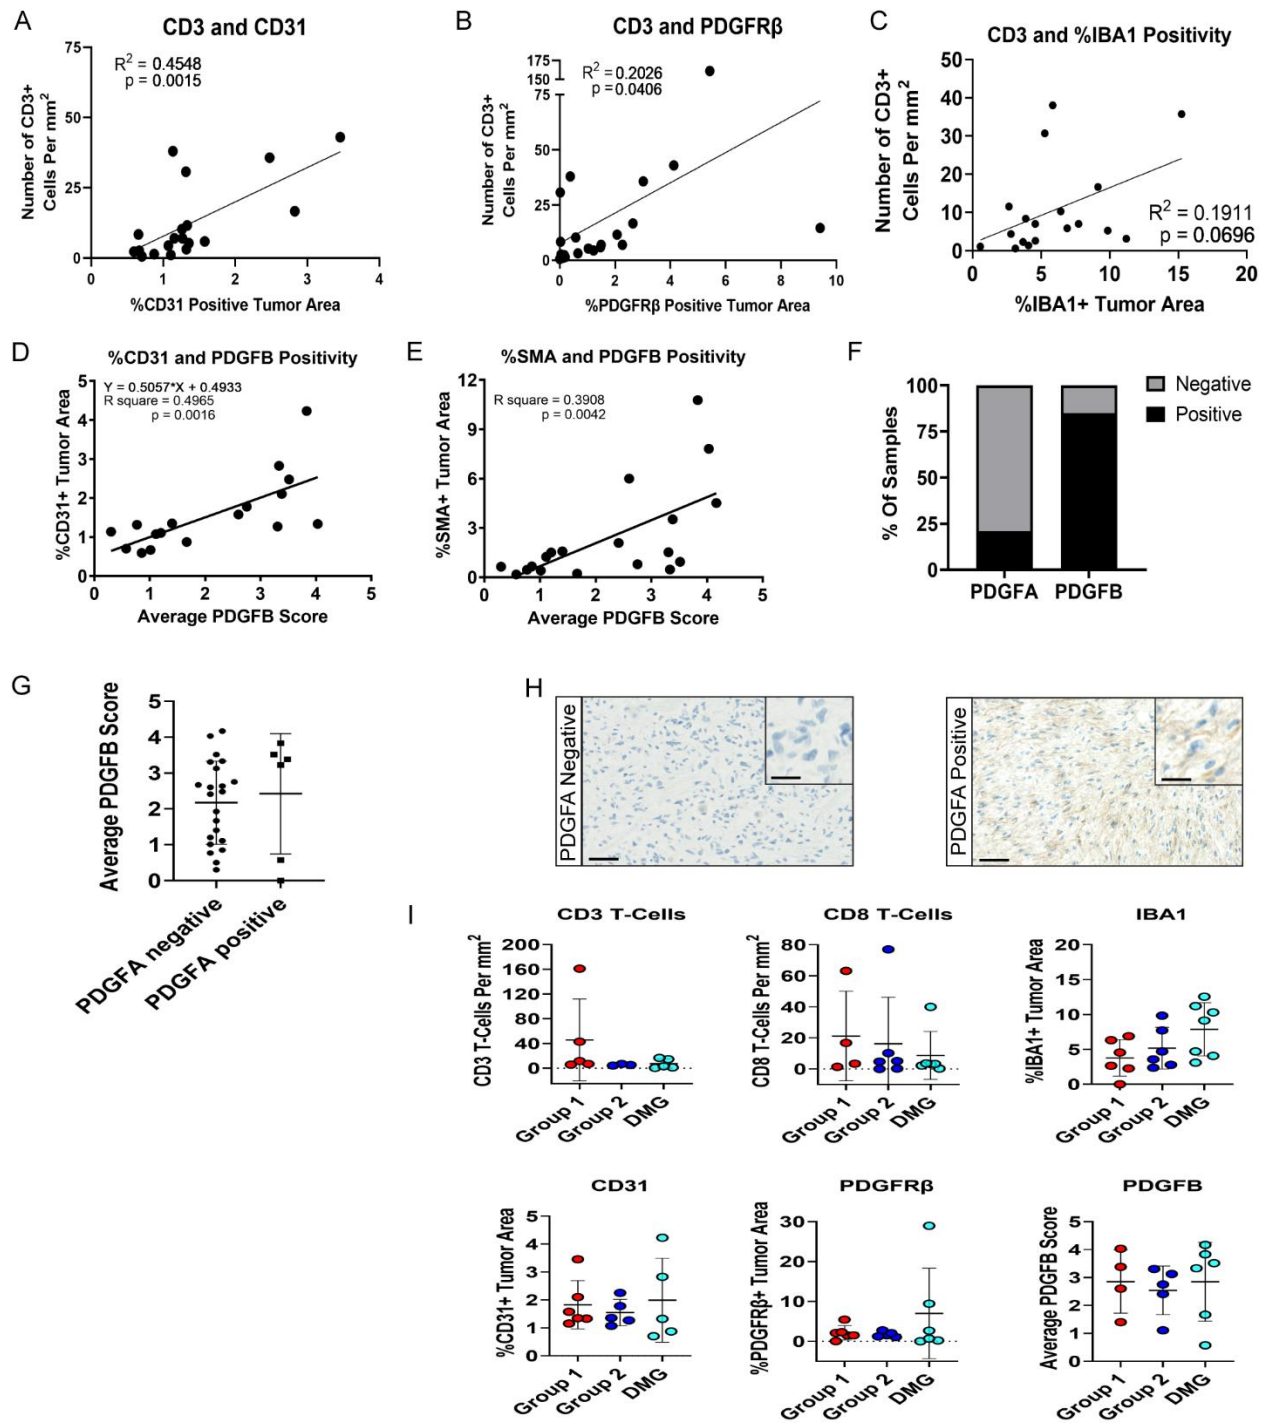

**Figure 2.** (A) Correlation between CD3 and CD31 immunohistochemical staining in human pHGG samples. (B) Correlation between CD3 and PDGFR $\beta$  staining in human pHGG samples. (C) Correlation between CD3 and IBA1 staining in human pHGG samples. (D) PDGFB positivity obtained from human pHGG tissue staining correlated with %CD31+ tumor area and (E) %SMA+ tumor area in matched samples. (F) Percent of human samples positively or

negatively stained for PDGFA and PDGFB ligands. There was no correlation between PDGFA and PDGFB staining. **(G)** Samples that stained negatively or positively for PDGFA and their corresponding PDGFB staining score. 7 out of 33 samples positively stained for PDGFA, and there was no correlation between PDGFA and PDGFB staining. **(H)** Negative and positive PDGFA staining in human pHGG samples. **(I)** IHC quantifications for the indicated markers, categorized by human hemispheric pHGG group 1 (more inflammatory), hemispheric pHGG group 2 (less inflammatory), and DMG. Only samples that had both NanoString and IHC done were included.

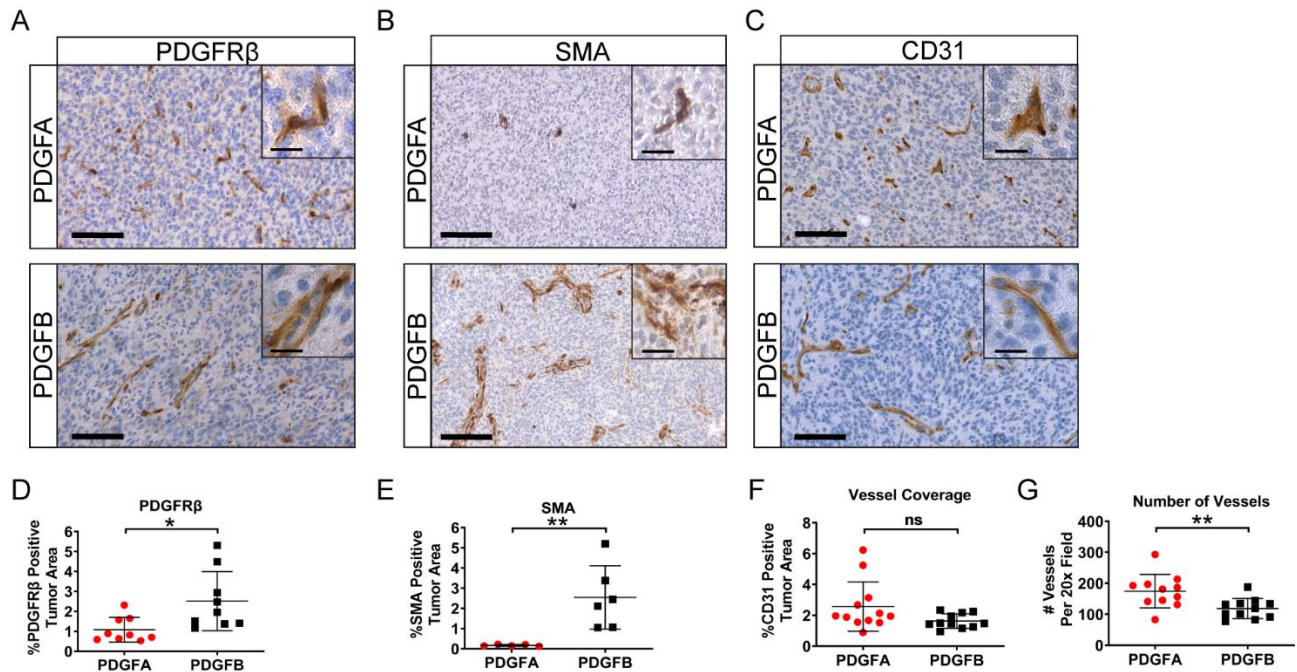

**Figure 3.** Representative immunohistochemical staining images from hemispheric tumors driven by PDGFA or PDGFB in *Ntva;Cdkn2a<sup>-/-</sup>* mice. **(A)** PDGFR $\beta$  staining. **(B)** Smooth muscle actin (SMA) staining. **(C)** CD31 staining. **(D)** Quantification of PDGFR $\beta$  staining. **(E)** Quantification of SMA staining. **(F)** Quantification of vessel coverage as indicated by CD31 staining. **(G)** Quantification of the number of blood vessels detected by CD31 staining. All representative images (a, b, c) are 20x with 80x magnified insets, scale bar=20 $\mu$ m and 100 $\mu$ m respectively. Students *t*-test, \* $p < 0.05$ , \*\* $p < 0.01$ .

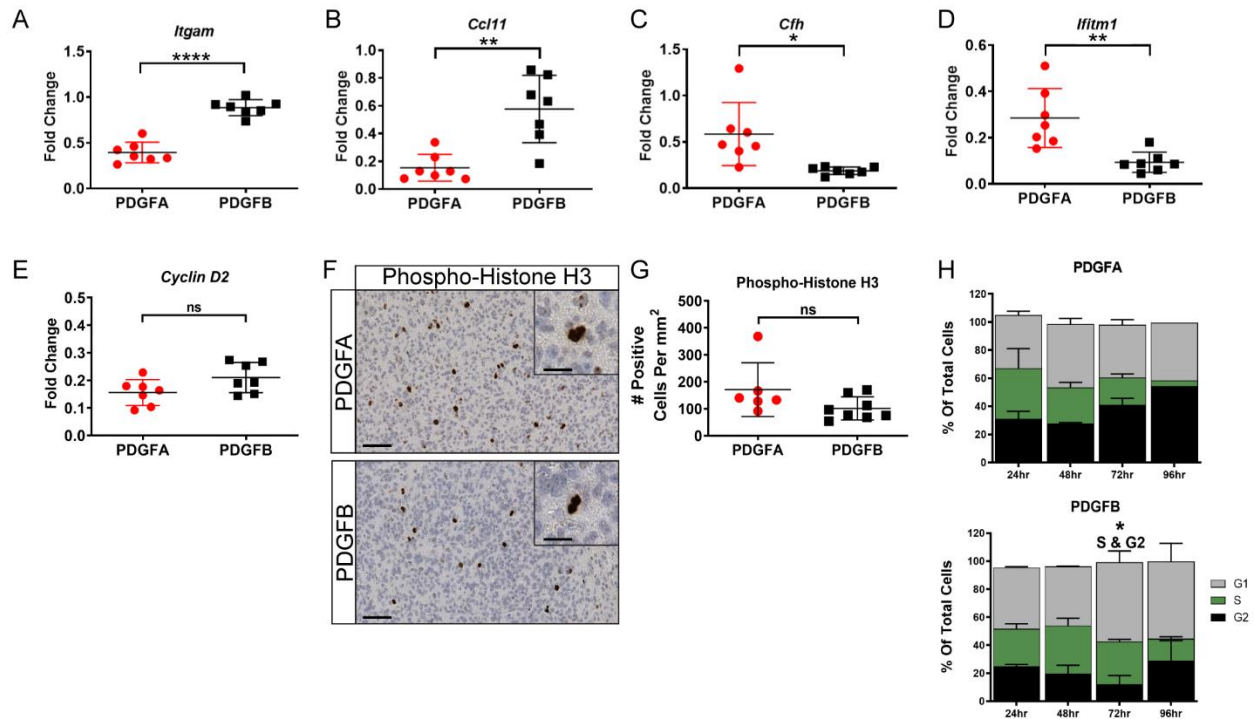

**Figure 4.** (A-D) qPCR validation of top differentially expressed genes found in NanoString analysis of PDGFA (n=7) and PDGFB-driven (n=7) tumors induced in *Ntva;Cdkn2a<sup>-/-</sup>* mice. (E) qPCR of *Cyclin D2* in PDGFA or PDGFB-driven tumors. (F-G) Phospho-histone H3 immunohistochemical staining and quantification. 40x with 80x magnified insets, scale bar=20μm and 100μm respectively. (H) Edu proliferation assay results for PDGFA primary cell lines (n=3) and PDGFB primary cell lines (n=2) at 24hr, 48hr, 72hr, and 96hrs. Students *t*-test, \*p<0.05, \*\*p<0.01, \*\*\*\*p<0.0001.



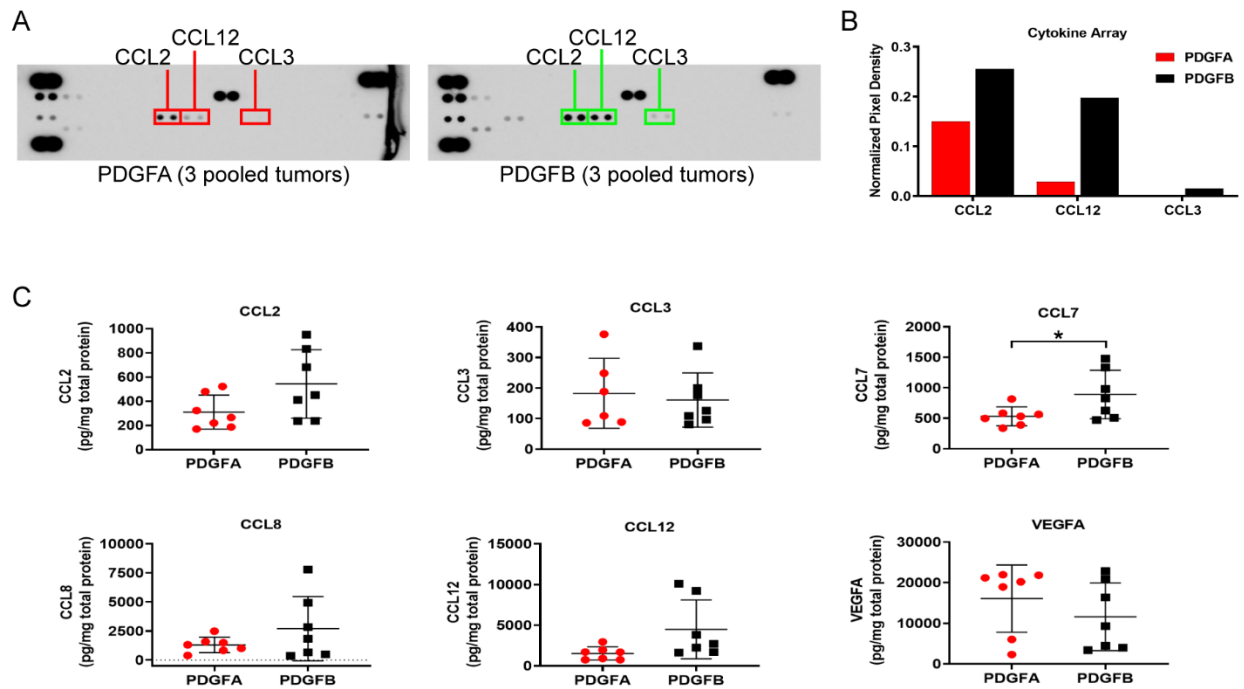

**Figure 5.** (A) Cytokine array of 3 pooled PDGFA tumor samples and 3 pooled PDGFB tumor samples. CCL2, CCL3, and CCL12 are all highlighted. (B) Quantification of pixel intensity for CCL2, CCL3, and CCL12 from the cytokine array. (C) Protein ELISA performed on PDGFA (n=7) and PDGFB (n=7) tumor samples for CCL2, CCL3, CCL7, CCL8, CCL12, and VEGFA. Students *t*-test. \* $p < 0.05$ .

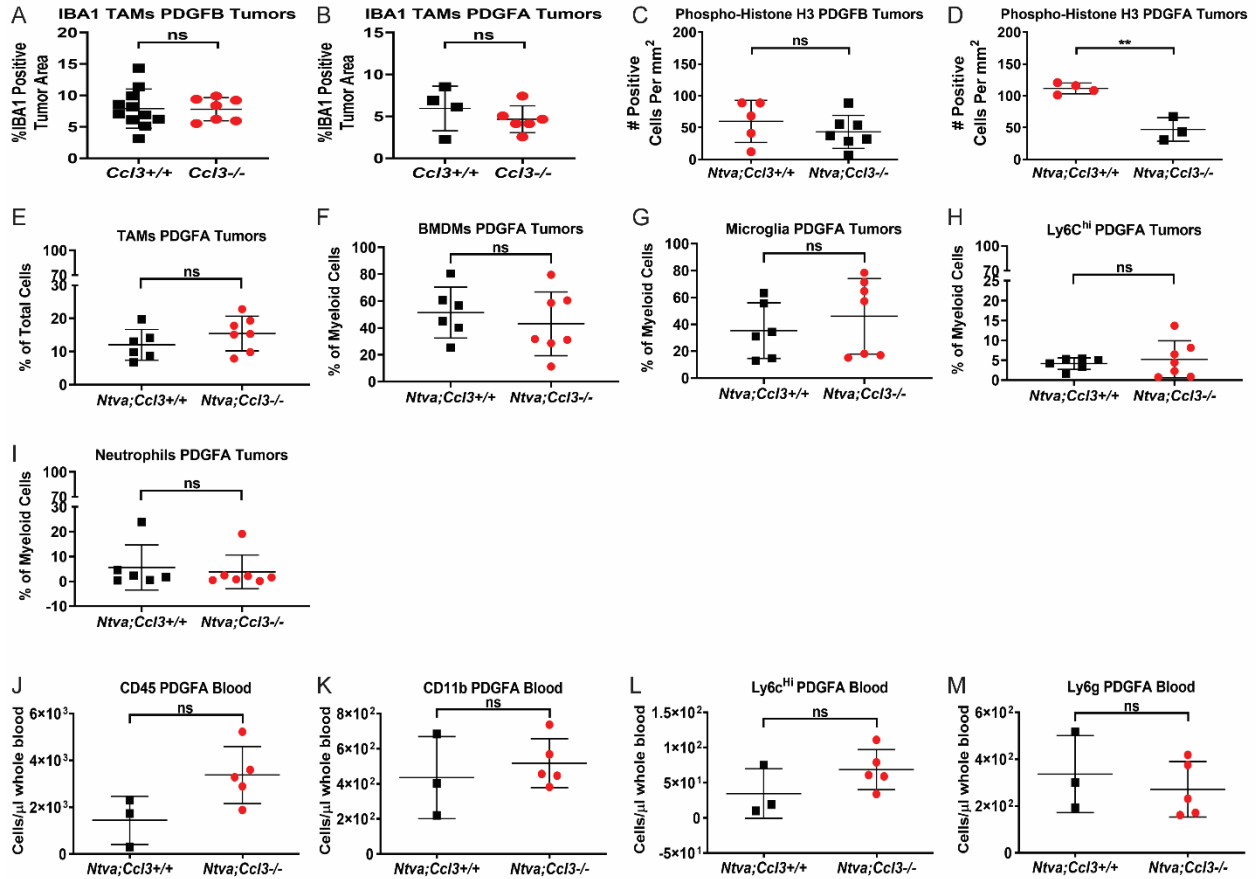

**Figure 6.** (A-B) Quantification of IBA1+ tumor area in PDGFB or PDGFA-driven tumors in *Ntva;Ccl3*<sup>+/+</sup> and *Ntva;Ccl3*<sup>-/-</sup> mice. (C-D) Quantification of Phospho-histone H3 staining in PDGFB and PDGFA-driven tumors in *Ntva;Ccl3*<sup>+/+</sup> and *Ntva;Ccl3*<sup>-/-</sup> mice. (E-I) Quantification of myeloid cell populations via flow cytometry in PDGFA-driven tumors in *Ntva;Ccl3*<sup>+/+</sup> and *Ntva;Ccl3*<sup>-/-</sup> mice. (J-M) Quantification of myeloid cell populations in the blood of PDGFA-driven tumors in *Ntva;Ccl3*<sup>+/+</sup> and *Ntva;Ccl3*<sup>-/-</sup> mice.

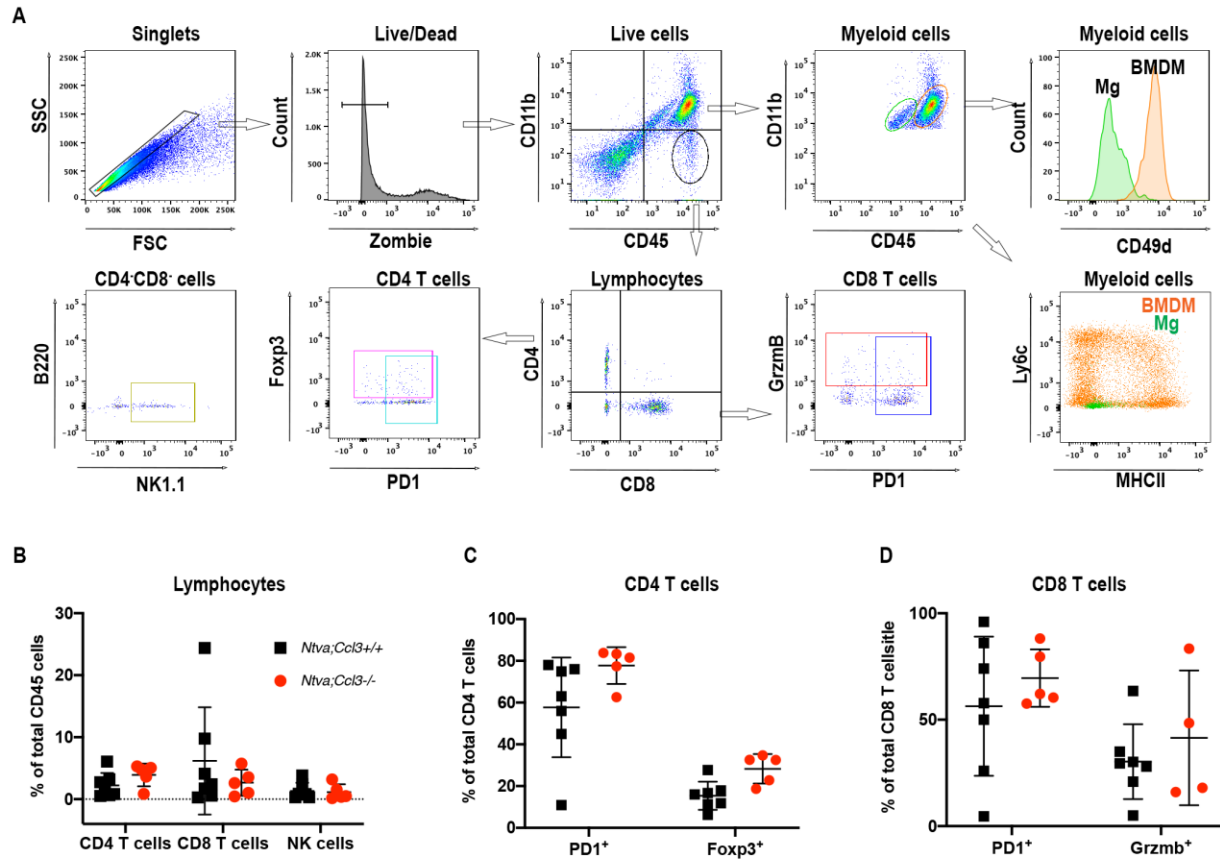

**Figure 7.** (A) Gating strategy for the analysis of intratumoral innate and adaptive cell infiltrates in PDGFB-driven tumors in *Ntva;Ccl3*<sup>+/+</sup> and *Ntva;Ccl3*<sup>-/-</sup> mice. (B) Quantification of CD4 T-cells, CD8 T-cells, and NK cells in PDGFB-driven tumors in *Ntva;Ccl3*<sup>+/+</sup> and *Ntva;Ccl3*<sup>-/-</sup> mice. (C) Quantification of PD1<sup>+</sup> or FOXP3<sup>+</sup> CD4 T-cells. (D) Quantification of PD1<sup>+</sup> or Granzyme B<sup>+</sup> CD8 T-cells. There were no significant differences found between WT and KO tumors for all comparisons in Figure 7B-D.

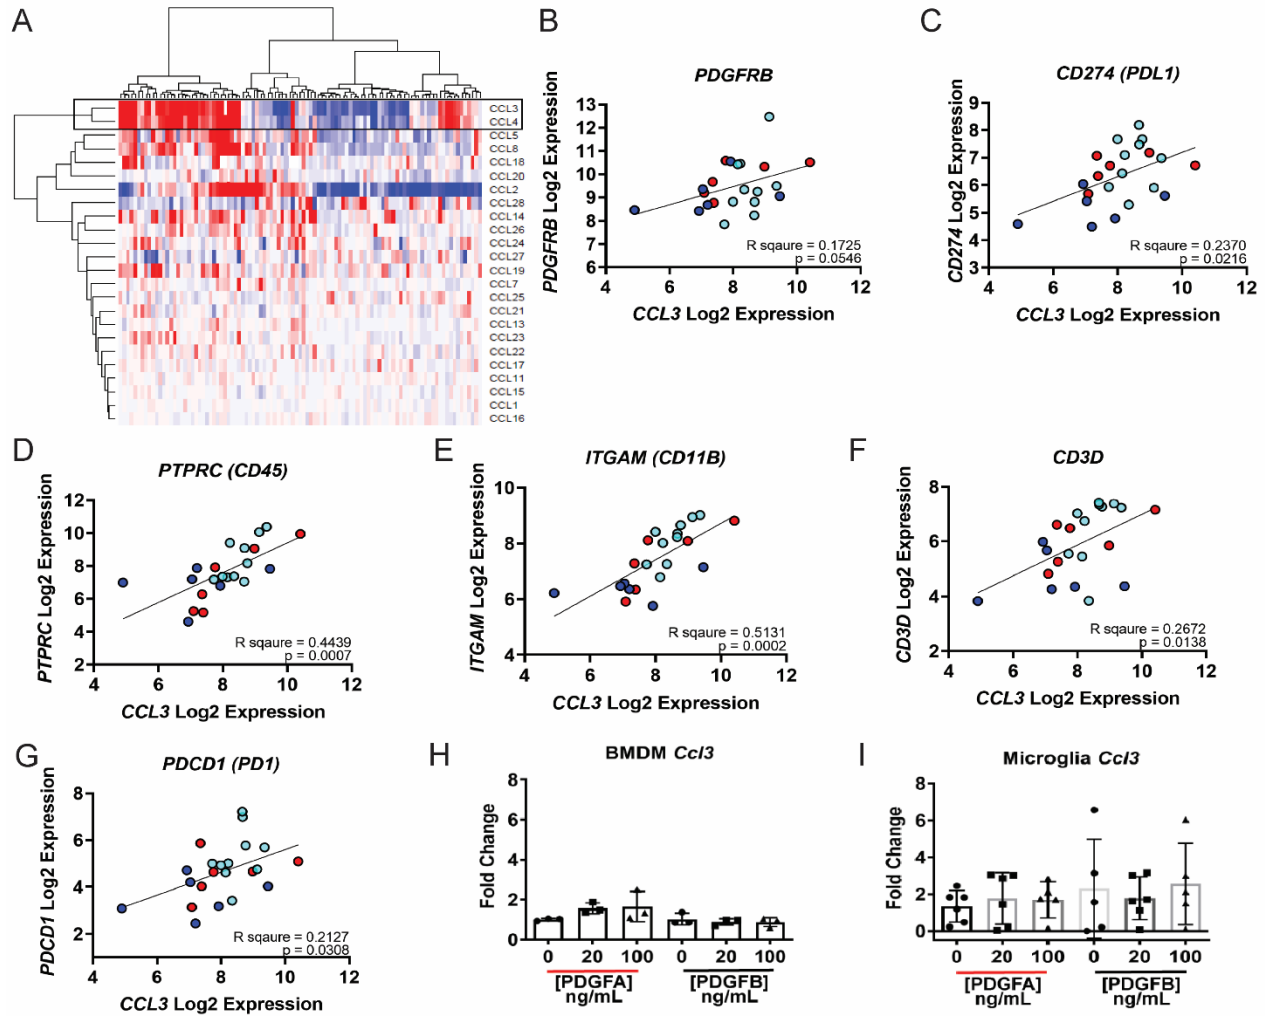

**Figure 8.** (A) Unsupervised hierarchical clustering of chemokines in human histone WT pHGG RNA sequencing data. n=101. (B-G) *CCL3* expression correlated with *PDGFRB*, *CD274*, *PTPRC*, *ITGAM*, *CD3D*, and *PDCD1* expression in our human pHGG NanoString dataset. Samples color coded by Group 1 hemispheric tumors (red), Group 2 hemispheric tumors (dark blue), or DIPG (light blue). n=22. (H-I) Primary BMDM or microglial cell cultures were stimulated with recombinant PDGFA or PDGFB for 6 hours and qPCR for *Ccl3* was performed. No significant differences were observed.

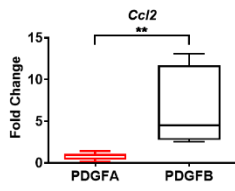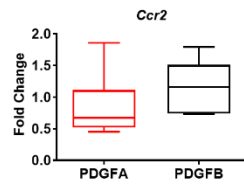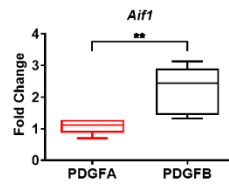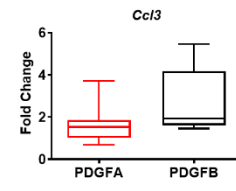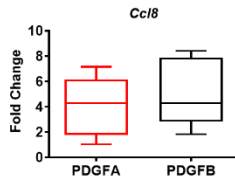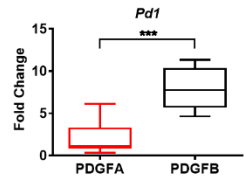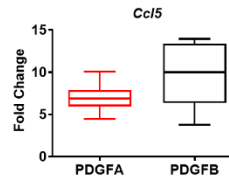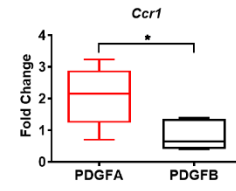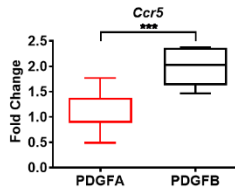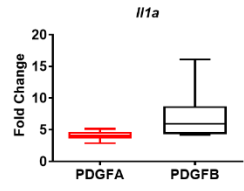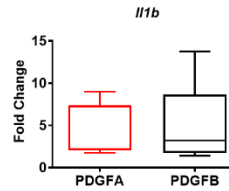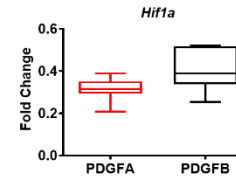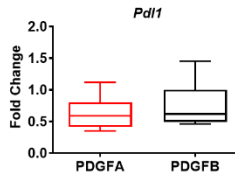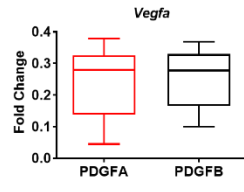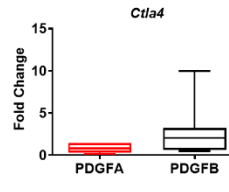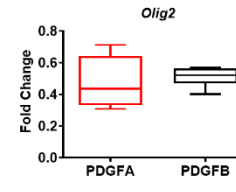

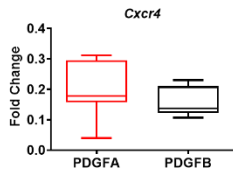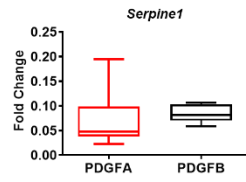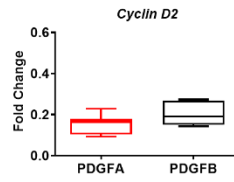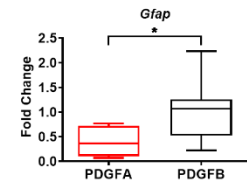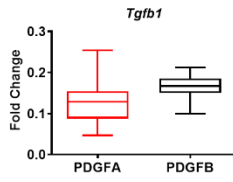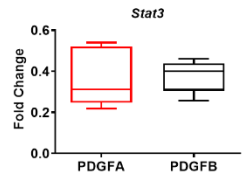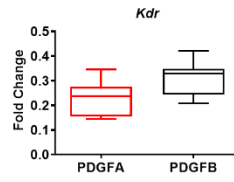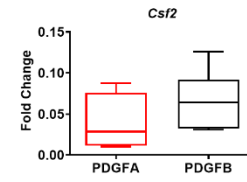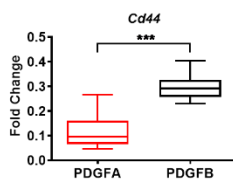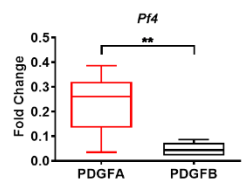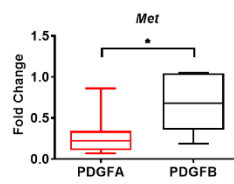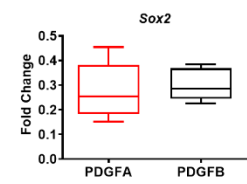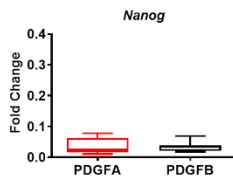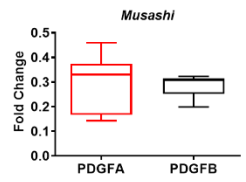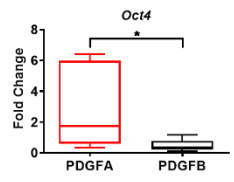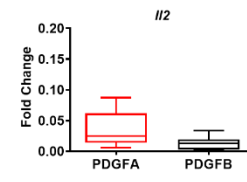

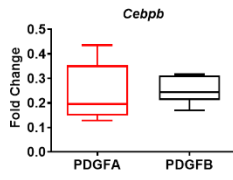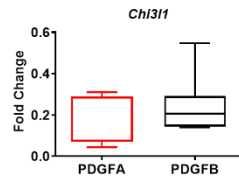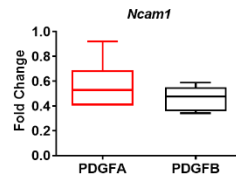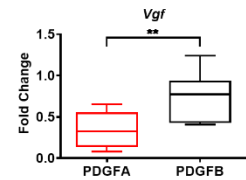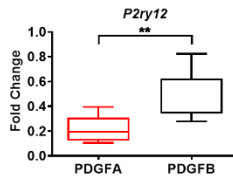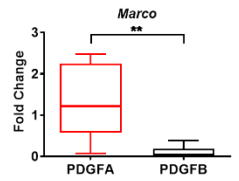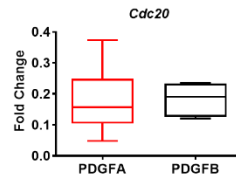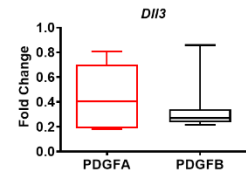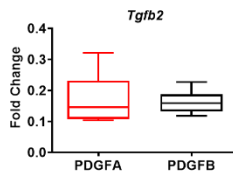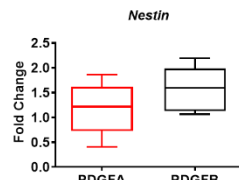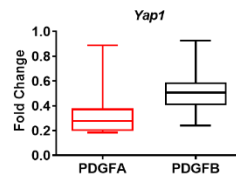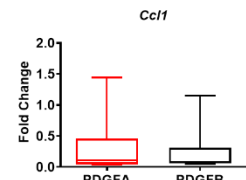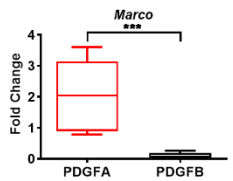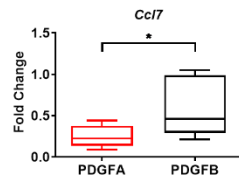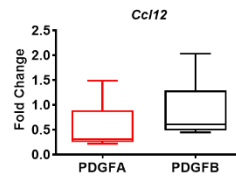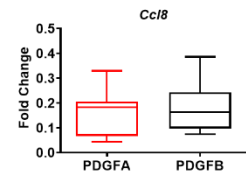

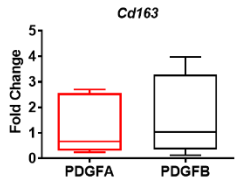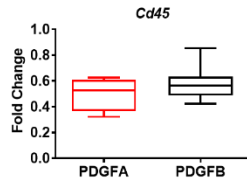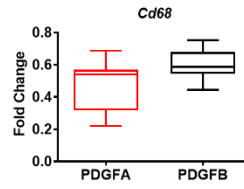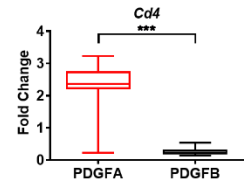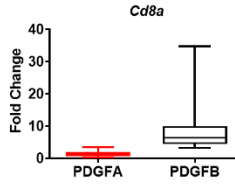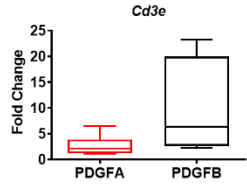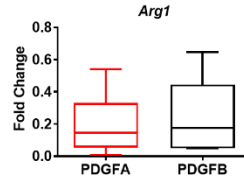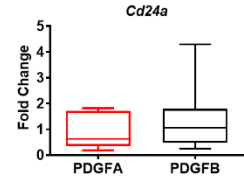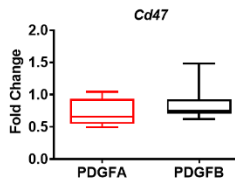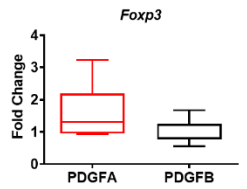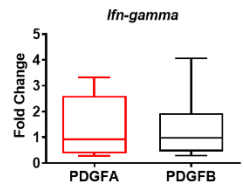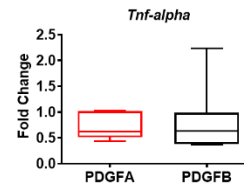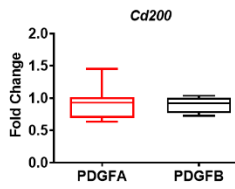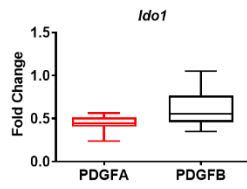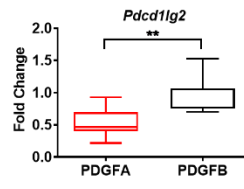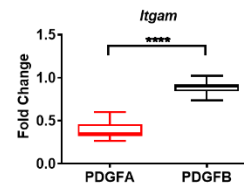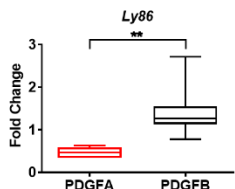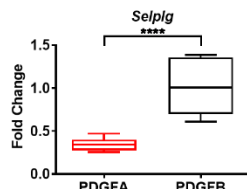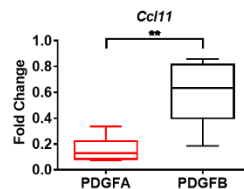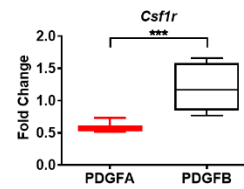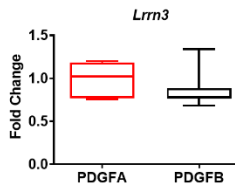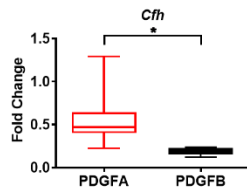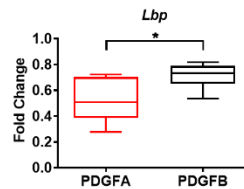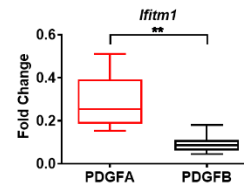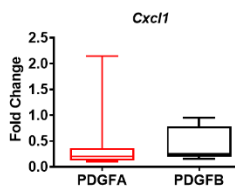



**Figure 9.** Box plots of all genes run on PDGFA (n=7) and PDGFB-driven (n=7) pHGG tumors in *Ntva;Cdkn2a*<sup>-/-</sup> mice.

| Sample ID | Diagnosis                 | Tumor Location          | Age at Dx (Mos) | Survival (Weeks since Dx) | Sex | Treatment | Molecular Characteristics                                                            | Nano-String |
|-----------|---------------------------|-------------------------|-----------------|---------------------------|-----|-----------|--------------------------------------------------------------------------------------|-------------|
| PGBM 1    | DIPG                      | Pons                    | 69.87           | 47.00                     | F   | -         | -                                                                                    | Y           |
| PGBM 2    | DIPG                      | Pons                    | 40.83           | 94.29                     | F   | -         | -                                                                                    | Y           |
| PGBM 3    | AA                        | Temporal, left          | 112.77          | 43.14                     | M   | -         | PIK3CA:p.H1047R mut. Loss of CDKN2A                                                  | Y           |
| PGBM 4    | DIPG                      | Pons, lateral           | 114.80          | 65.86                     | M   | -         | EGFR amp, CDK6 amp                                                                   | Y           |
| PGBM 5    | GBM                       | Basal ganglia, right    | 6.50            | 29.57                     | F   | -         | -                                                                                    | Y           |
| PGBM 6    | GBM                       | Frontal, right          | 145.33          | 40.43                     | M   | -         | PIK3CA:p.H1047R mut. Loss of CDKN2A                                                  | Y           |
| PGBM 7    | DIPG                      | Pons                    | 76.00           | 34.57                     | F   | -         | -                                                                                    | N           |
| PGBM 8    | DIPG                      | Pons                    | 119.27          | 59.14                     | F   | -         | -                                                                                    | N           |
| PGBM 9    | GBM                       | Pons                    | 41.60           | 48.86                     | F   | -         | -                                                                                    | N           |
| PGBM 10   | DIPG                      | Pons                    | 55.53           | 85.43                     | F   | -         | -                                                                                    | Y           |
| PGBM 11   | GBM                       | Frontal, right          | 203.30          | 20.29                     | M   | -         | MET-PTPRZ1 gene fusion                                                               | Y           |
| PGBM 12   | DIPG                      | Pons                    | 88.03           | 76.86                     | M   | -         | -                                                                                    | Y           |
| PGBM 13   | GBM                       | Temporal, left          | 141.67          | 67.71                     | M   | Radiation | -                                                                                    | Y           |
| PGBM 14   | GBM-K27M                  | -                       | 0.00            | 0.00                      | -   | -         | K27M                                                                                 | N           |
| PGBM 15   | AA-G34R                   | Temporal, Left          | 206.27          | alive                     | F   | -         | H3-G34R & TP53 mutations                                                             | Y           |
| PGBM 16   | Thalamic K27M             | Thalamus/frontal, right | 187.50          | 15.14                     | M   | -         | K27M                                                                                 | Y           |
| PGBM 17   | DIPG-K27M                 | Pons                    | 48.93           | 155.86                    | M   | -         | K27M                                                                                 | N           |
| PGBM 18   | DIPG-K27M                 | Pons                    | 149.20          | 249.43                    | F   | -         | K27M                                                                                 | N           |
| PGBM 19   | GBM                       | Parietal, right         | 194.87          | 31.29                     | M   | Radiation | -                                                                                    | Y           |
| PGBM 20   | GBM                       | Parietal, right         | 164.93          | 45.86                     | F   | Radiation | -                                                                                    | Y           |
| PGBM 21   | GBM-K27M                  | Thalamus, left          | 67.13           | 41.00                     | M   | -         | K27M                                                                                 | Y           |
| PGBM 22   | GBM                       | Frontal, right          | 183.33          | alive                     | M   | Radiation | -                                                                                    | Y           |
| PGBM 23   | GBM                       | Temporal, left          | 204.60          | 283.43                    | M   | Radiation | -                                                                                    | Y           |
| PGBM 24   | GBM                       | Temporal, left          | 173.73          | 84.43                     | M   | -         | EGFR amp, PTEN loss                                                                  | Y           |
| PGBM 25   | GBM-K27M                  | Thalamus, left          | 179.23          | 75.14                     | M   | -         | K27M                                                                                 | Y           |
| PGBM 26   | GBM-G34R                  | Temporal, left          | 157.37          | 126.29                    | M   | -         | H3 G34R                                                                              | Y           |
| PGBM 27   | GBM                       | Right                   | 60.00           | 9.00                      | M   | -         | Amp. MYCN, ampMDM4, ampMIR205                                                        | N           |
| PGBM 28   | GBM                       | Right frontoparietal    | 60.00           | 17.00                     | M   | -         | EGFR amp, CDK6 amp                                                                   | N           |
| PGBM 29   | Anaplastic Ependymoma III | Right hemisphere        | 180.00          | 24.00                     | F   | -         | -                                                                                    | N           |
| PGBM 30   | AA III/IV-G34R/V          | Temporal, right         | 120.00          | 25.00                     | M   | -         | H3 G34V, P53 mut, EGFR gain, CDK6 gain, MET gain, MYCN gain, CDKN2A gain, PTCH1 gain | N           |

|                |           |                           |        |        |   |   |                                                 |   |
|----------------|-----------|---------------------------|--------|--------|---|---|-------------------------------------------------|---|
| <b>PGBM 31</b> | GBM       | Left frontal lobe         | 60     | 7      | F | - | -                                               | N |
| <b>PGBM 32</b> | GBM       | Left frontal lobe         | 144    | 16     | M | - | EGFR, TERT,<br>PIK3CA mutations,<br>CDKN2A loss | N |
| <b>PGBM 33</b> | GBM       | Left CP angle near pons   | 96     | 11     | F | - | -                                               | N |
| <b>PGBM 34</b> | DIPG      | Pons                      | 47.00  | 152.08 | - | - | K27M                                            | N |
| <b>PGBM 35</b> | DIPG      | Pons                      | 39.00  | 91.25  | - | - | K27M                                            | N |
| <b>PGBM 36</b> | DIPG      | Pons                      | 68.00  | 43.45  | - | - | K27M unknown                                    | N |
| <b>PGBM 37</b> | DIPG      | Pons                      | 54.00  | 82.55  | - | - | K27M unknown                                    | N |
| <b>PGBM 38</b> | DIPG      | Pons                      | 146.00 | 247.67 | - | - | K27M                                            | N |
| <b>PGBM 39</b> | GBM-K27M  | Right                     | -      | -      | M | - | -                                               | N |
| <b>PGBM 40</b> | GBM-G34R  | Temporo-parietal, right   | 254.40 | alive  | M | - | G34R                                            | Y |
| <b>PGBM 41</b> | AA        | Pons                      | 161.90 | 45.29  | M | - | -                                               | N |
| <b>PGBM 42</b> | AA        | Right hemisphere, thalami | 213.23 | alive  | M | - | -                                               | N |
| <b>PGBM 43</b> | GBM-K27M  | Thalamus, right           | 140.40 | 79.14  | F | - | K27M                                            | N |
| <b>PGBM 44</b> | DIPG-K27M | Pons                      | 157.20 | alive  | M | - | K27M                                            | N |
| <b>PGBM 45</b> | DIPG      | Pons                      | 143.77 | 453.29 | M | - | Not K27M                                        | Y |
| <b>PGBM 46</b> | AA-K27M   | Thalami                   | 201.37 | 59     | F | - | K27M                                            | N |
| <b>PGBM 48</b> | GBM-K27M  | Thalamus                  | -      | -      | - | - | K27M                                            | Y |

**Table 1.** Patient characteristics of samples used in this study.

| <b>Antibody</b>     | <b>Application</b>       | <b>Host Tissue</b> | <b>Company</b> | <b>Catalog Number</b> |
|---------------------|--------------------------|--------------------|----------------|-----------------------|
| IBA1                | IHC                      | Mouse, Human       | Wako           | 019-19741             |
| PDGFRa              | IHC                      | Mouse              | Cell Signaling | CST 3174S             |
| PDGFRb              | IHC                      | Mouse              | Cell Signaling | CST 3169S             |
| Phospho Histone 3   | IHC                      | Mouse              | Cell Signaling | CST 9701S             |
| CD31                | IHC                      | Mouse              | Dianova        | DIA-310               |
| Smooth Muscle Actin | IHC                      | Mouse              | Dako           | M0851                 |
| PDGFA               | IHC                      | Human              | Santa Cruz     | sc-128                |
| PDGFB               | IHC                      | Human              | Santa Cruz     | sc-127                |
| PDGFRa              | IHC                      | Human              | Cell Signaling | cs3174                |
| PDGFRb              | IHC                      | Human              | Cell Signaling | cs3169                |
| CD31                | IHC                      | Human              | Dako           | M0823                 |
| CD3                 | IHC                      | Human              | Dako           | A0452                 |
| CD8                 | IHC                      | Human              | Dako           | M7103                 |
|                     |                          |                    |                |                       |
| CD45-APC            | Flow Cytometry           | Mouse              | BioLegend      | 103112                |
| CD11b-PerCP-Cy5.5   | Flow Cytometry           | Mouse              | BD Biosciences | 550993                |
| Ly6C-PE-Cy7         | Flow Cytometry           | Mouse              | BD Biosciences | 560593                |
| Ly6C-BV-650         | Flow Cytometry           | Mouse              | BioLegend      | 128049                |
| Ly6G-V450           | Flow Cytometry           | Mouse              | BD Biosciences | 560603                |
| CD49d-PE-Cy7        | Flow Cytometry           | Mouse              | BioLegend      | 103617                |
| I-A/I-E-A700        | Flow Cytometry           | Mouse              | BioLegend      | 107621                |
| CD4-APC-Cy7         | Flow Cytometry           | Mouse              | BioLegend      | 100526                |
| CD8-BV-510          | Flow Cytometry           | Mouse              | BioLegend      | 100752                |
| B220-BV-605         | Flow Cytometry           | Mouse              | BioLegend      | 103243                |
| NK1.1-BV-711        | Flow Cytometry           | Mouse              | BD Biosciences | 740663                |
| PD1-BV-785          | Flow Cytometry           | Mouse              | BioLegend      | 135225                |
| Foxp3-FITC          | Flow Cytometry           | Mouse              | eBiosciences   | 11-5773-82            |
| GranzymeB-PE        | Flow Cytometry           | Human/Mouse        | eBiosciences   | 12-8899-41            |
|                     |                          |                    |                |                       |
| PDGFAA              | Cell Culture Stimulation | Human              | R&D            | 221-AA-010            |
| PDGFBB              | Cell Culture Stimulation | Human              | R&D            | 220-BB-010            |

**Table 2.** All antibodies used in the study are listed.

| <b>Primer</b> | <b>Bio-Rad Catalog Number</b> | <b>Primer</b> | <b>Bio-Rad Catalog Number</b> |
|---------------|-------------------------------|---------------|-------------------------------|
| Actb          | qMmuCED0027505                | Pd1           | qMmuCID0011570                |
| Cdc20         | qMmuCED0005008                | Ccr5          | qMmuCID0020341                |
| Dll3          | qMmuCID0023659                | Cd44          | qMmuCID0025677                |
| Tgfb2         | qMmuCID0024408                | Met           | qMmuCID0017026                |
| Yap1          | qMmuCID0005990                | Ccl7          | qMmuCED0049027                |
| Mgmt          | qMmuCID0009593                | Il2           | qMmuCED0060978                |
| Ccr8          | qMmuCID0006837                | Pdl1          | qMmuCID0011907                |
| Ctla4         | qMmuCID0008808                | Pdgfa         | qHsaCID0005879                |
| Sox2          | qMmuCED0051857                | Ccl8          | qMmuCED0003781                |
| Oct4          | qMmuCED0046525                | Ccl5          | qMmuCID0021047                |
| Musashi       | qMmuCID0040186                | Vegfa         | qMmuCED0040260                |
| Nanog         | qMmuCID0005399                | Nestin        | qMmuCID0023067                |
| Stat3         | qMmuCID0021132                | Spp1          | qMmuCED0061675                |
| Ccnd2         | qMmuCID0023538                | Cxcr4         | qMmuCED0026325                |
| Cxcr4         | qMmuCED0026325                | Cxcl12        | qMmuCID0019961                |
| Kdr           | qMmuCID0005890                | Cd8a          | qMmuCID0016523                |
| Ncam1         | qMmuCID0005870                | Foxp3         | qMmuCID0022414                |
| Ccl3          | qMmuCED0003870                | Lbp           | qMmuCED0045303                |
| Chi3l1        | qMmuCID0015758                | Cfh           | qMmuCED0045575                |
| Serpine1      | qMmuCID0027303                | Lrrn3         | qMmuCID0019276                |
| Pdgfb         | qHsaCID0016004                | Csf1r         | qMmuCID0016567                |
| Il1a          | qMmuCID0005637                | Ccl11         | qMmuCED0044849                |
| Pf4           | qMmuCED0003895                | Selplg        | qMmuCED0050109                |
| Tgfb1         | qMmuCID0017320                | Ly86          | qMmuCED0045007                |
| Marco         | qMmuCID0023893                | Itgam         | qMmuCID0005971                |
| Csf2          | qMmuCED0025728                | Pdcd1lg2      | qMmuCID0011922                |
| P2ry12        | qMmuCID0015382                | Ido1          | qMmuCED0047121                |
| Vgf           | qMmuCED0049363                | Cd200         | qMmuCED0045566                |
| Gfap          | qMmuCID0020163                | Tnfa          | qMmuCED0004141                |
| Aif1          | qMmuCED0046745                | Ifng          | qMmuCID0006268                |
| Il1b          | qMmuCID0005641                | Cd47          | qMmuCED0049651                |
| Ccr1          | qMmuCID0006862                | Arg1          | qMmuCID0022400                |
| Ccl2          | qMmuCED0048300                | Cd3e          | qMmuCED0047615                |
| Ccl1          | qMmuCED0038249                | Cd8a          | qMmuCID0016523                |
| Olig2         | qMmuCED0003760                | Cd4           | qMmuCID0022320                |
| Cebpb         | qMmuCED0050360                | Cd68          | qMmuCED0003822                |

|       |                |                 |                |
|-------|----------------|-----------------|----------------|
| Ccr1  | qMmuCID0006862 | Cd45<br>(Ptpcr) | qMmuCID0039693 |
| Ccl12 | qMmuCED0061017 | Cd163           | qMmuCID0012017 |

**Table 3. qPCR Primers Used in Study.** The Bio-Rad qPCR primers used in the study are listed with their catalog numbers.

Chen Z, Herting CJ, Ross JL, Gabanic B, Puigdelloses Vallcorba M, Szulzewsky F, *et al.* Genetic driver mutations introduced in identical cell-of-origin in murine glioblastoma reveal distinct immune landscapes but similar response to checkpoint blockade. *Glia* 2020.

Herting CJ, Chen Z, Maximov V, Duffy A, Szulzewsky F, Shayakhmetov DM, *et al.* Tumour-associated macrophage-derived interleukin-1 mediates glioblastoma-associated cerebral oedema. *Brain* 2019.

Mackay A, Burford A, Carvalho D, Izquierdo E, Fazal-Salom J, Taylor KR, *et al.* Integrated Molecular Meta-Analysis of 1,000 Pediatric High-Grade and Diffuse Intrinsic Pontine Glioma. *Cancer Cell* 2017; 32(4): 520-37 e5.
